# Supplementary material for: Iron-sulfur cluster loss in mitochondrial CISD1 mediates PINK1 loss-of-function phenotypes
Source: eLife journal article supplement (doi:10.7554/elife.97027), 2024-08-19
Supplement: supp [file elife-97027-supp-v1.zip]

## Sheet: 4A
Figure nb		Samples						Statistics			Figure
4A	PinkB9 DaGal4>CISD1 OE	PinkB9 DaGal4>C111S OE	PinkB9 DaGal4>MitoGFP	DaGal4>CISD1 OE	DaGal4>C111S OE	DaGal4>MitoGFP		one-way anova
	36	12	48	44	24	84
	20	4	52	52	16	76
	24	8	44	84	28	72
	28	12	52	36	24	88
	DaG>MitoGFP	Da>CISD	Da>C111S	PinkDa>MitoGFP	PinkDa>C111S	PinkDa>CISD
	31	17	15	22	5	9		one way anova
	35	19	13	23	5	7
	35	16	15	21	6	9
	40	17	13	21	5	9

## Sheet: 4B
4B	PinkDa>C111S Flies
	sum noCyO	Sum smoky	% of Smoky/noCyo
	14	9	64.2857		One-way anova
	15	11	73.3333
	8	5	62.5
	9	6	66.6667

## Sheet: 4C
4C	PinkDa_MitoGFP	PinkDa_CISD	PinkDa_C111S	Da_MitoGFP	Da_CISD	Da_C111S		One-way anova
	1.00205	1.92813	0.0942564	1.64546	2.5195	5.2227
	1.30207	1.30217	0.109096	3.47178	1.62629	8.25927
	1.19098	0.961218	0.656177	2.71604	1.05694	5.58773
	1.93323	0.5346	0.275731	2.11199	0.72315	2.27471
