# Supplementary material for: Iron-sulfur cluster loss in mitochondrial CISD1 mediates PINK1 loss-of-function phenotypes
Source: eLife journal article supplement (doi:10.7554/elife.97027), 2024-08-19
Supplement: supp [file Figure 5 - figure supplement 2 - source data 1.xlsx]

## Sheet: B
	5 days climbing
	w1118;;	;;Cisd2KO
	91.67	91.23
	81.67	95
	83.33	90
	78.33	93.33
	85	98.67
		86.67
	30 days climbing
	w1118;;	Cisd2KO
	55.56	34.92
	53.33	54.55
	37.88	80
	55.56	53.09
	54.67	60.87
	63.64	41.94
	75

## Sheet: C
		w1118;; 1	w1118;; 2	w1118;; 3	w1118;; 4	;;Cisd2-KO	;;Cisd2-KO	;;Cisd2-KO	;;Cisd2-KO
w1118 ↓													Analysed with survival graph
23	23	1
38	38	1
44	44	1
44	44	1
47	47	1
47	47	1
47	47	1
53	53	1
53	53	1
53	53	1
53	53	1
56	56	1
59	59	1
59	59	1
59	59	1
63	63	1
63	63	1
65	65	1
65	65	1
65	65	1
69	69	1
69	69	1
69	69	1
69	69	1
70	70	1
70	70	1
70	70	1
75	75	1
75	75	1
75	75	1
79	79	1
80	80	1
80	80	1
XXX
2	2		1
18	18		1
23	23		1
35	35		1
38	38		1
41	41		1
41	41		1
41	41		1
44	44		1
44	44		1
44	44		1
47	47		1
47	47		1
47	47		1
47	47		1
49	49		1
49	49		1
53	53		1
53	53		1
53	53		1
56	56		1
56	56		1
59	59		1
59	59		1
63	63		1
63	63		1
63	63		1
65	65		1
65	65		1
75	75		1
80	80		1
XXX
2	2			1
2	2			1
8	8			1
18	18			1
30	30			1
35	35			1
38	38			1
38	38			1
41	41			1
41	41			1
44	44			1
44	44			1
44	44			1
47	47			1
47	47			1
48	48			1
53	53			1
56	56			1
56	56			1
56	56			1
56	56			1
59	59			1
59	59			1
59	59			1
63	63			1
65	65			1
65	65			1
69	69			1
70	70			1
70	70			1
XXX
30	30				1
38	38				1
41	41				1
47	47				1
47	47				1
48	48				1
53	53				1
59	59				1
59	59				1
59	59				1
63	63				1
Cisd2KO ↓
	12					1
	27					1
	30					1
	35					1
	37					1
	41					1
	41					1
	47					1
	47					1
	47					1
	47					1
	47					1
	47					1
	47					1
	47					1
	49					1
	49					1
	49					1
	53					1
	53					1
	56					1
	56					1
	59					1
	63					1
	65					1
	65					1
	69					1
XXX
	27						1
	30						1
	30						1
	35						1
	38						1
	38						1
	39						1
	39						1
	40						1
	40						1
	41						1
	41						1
	41						1
	44						1
	44						1
	44						1
	44						1
	47						1
	47						1
	47						1
	47						1
	47						1
	47						1
	49						1
	49						1
	53						1
	53						1
	56						1
	56						1
	56						1
	59						1
	59						1
XXX
	27							1
	35							1
	35							1
	37							1
	38							1
	40							1
	40							1
	41							0
	41							0
	44							1
	44							1
	44							1
	44							1
	47							1
	47							1
	47							1
	47							1
	47							1
	47							1
	47							1
	47							1
	47							1
	47							1
	53							1
	53							1
	56							1
	59							1
	59							1
	59							1
XXX
	6								0
	12								0
	30								1
	37								1
	40								1
	41								1
	41								1
	44								1
	44								1
	44								1
	47								1
	47								1
	47								1
	56								1
	63								1
	65								1
